# Supplementary material
Source: publisher site journal article supplement (https://www.dovepress.com/article/548026)

Supplementary Figure 1

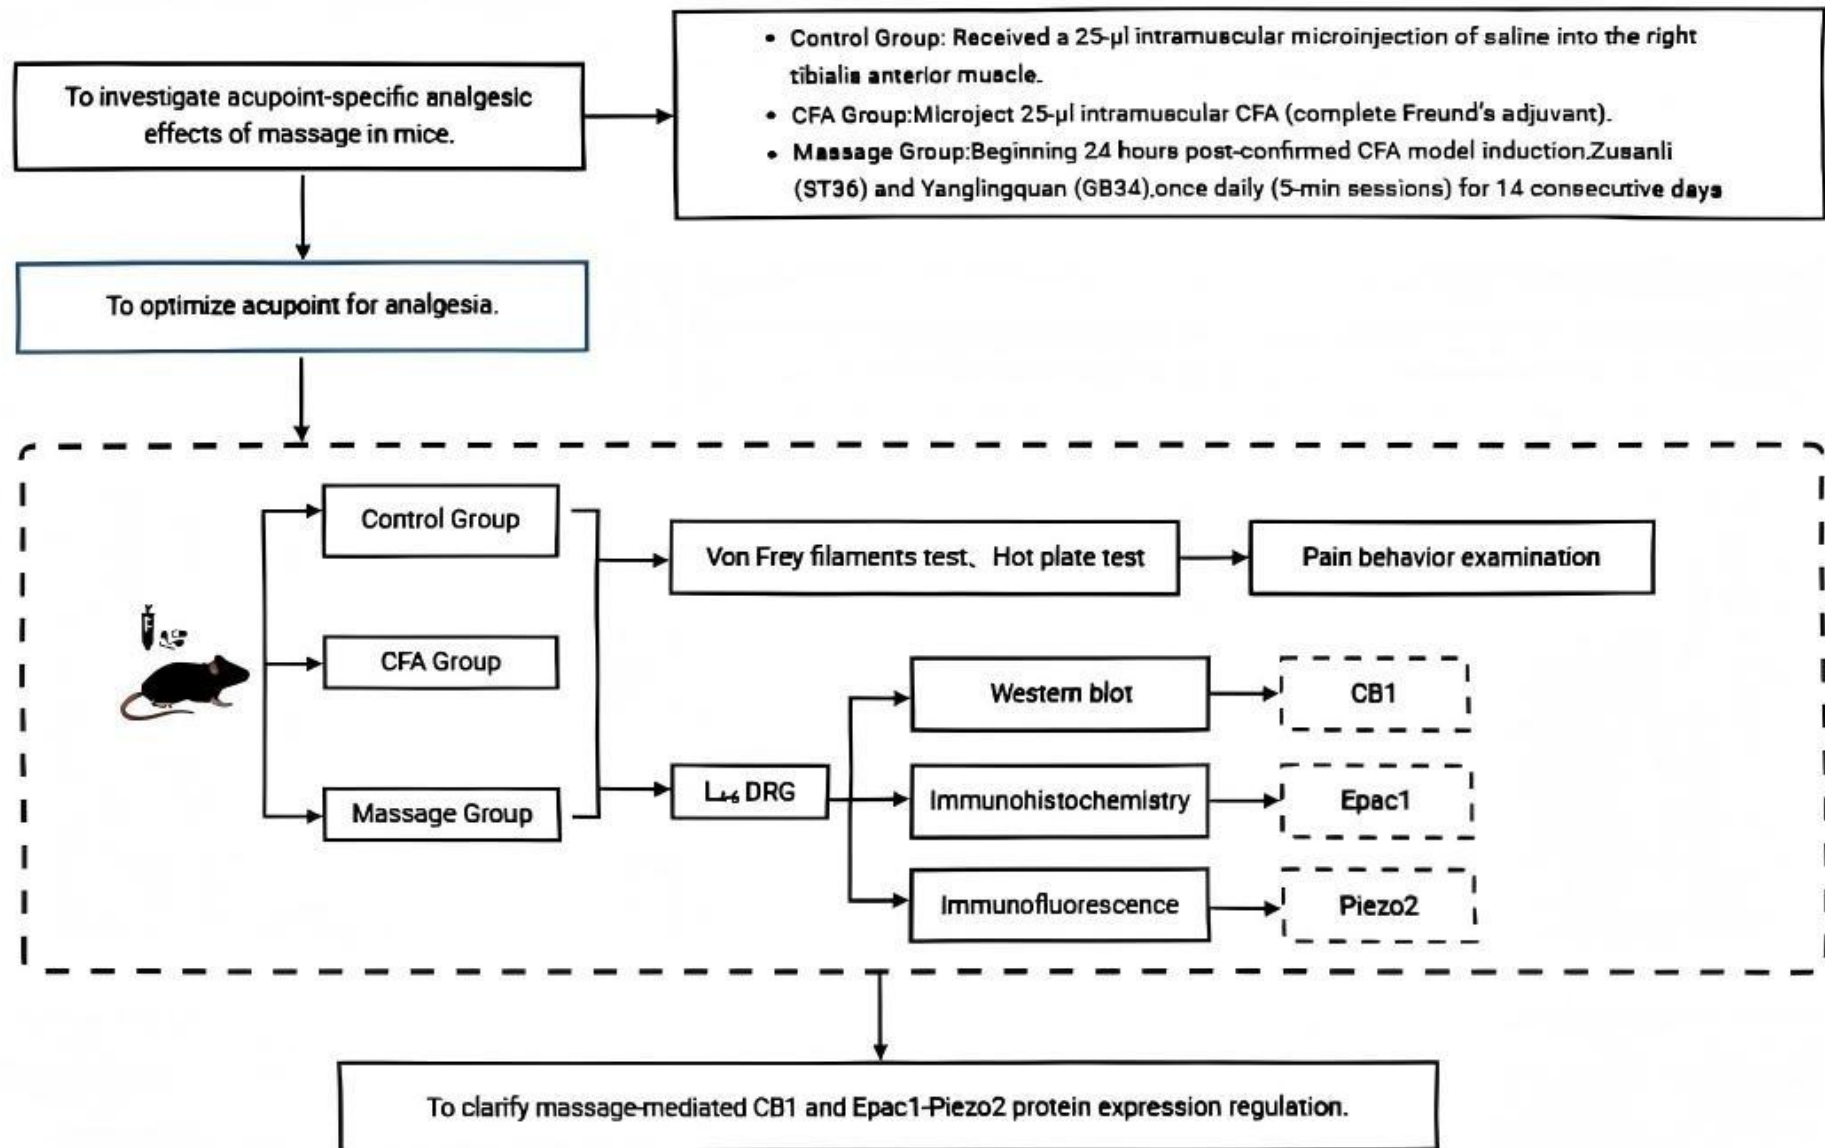

Technology roadmap

Supplement: Supplementary file 1 [file 548026%20Supplementary%20Material.pdf]
